# Supplementary material for: Targeted Radionuclide Therapy Using Auger Electron Emitters: The Quest for the Right Vector and the Right Radionuclide
Source: MDPI journal article supplement (doi:10.3390/pharmaceutics13070980), 2021-06-29
Supplement: s1 [file s1]

# Supplementary Materials: Targeted Radionuclide Therapy Using Auger Electron Emitters: The Quest for the Right Vector and the Right Radionuclide

Malick Bio Idrissou, Alexandre Pichard, Bryan Tee, Tibor Kibedi, Sophie Poty and Jean-Pierre Pouget

Supplementary figure

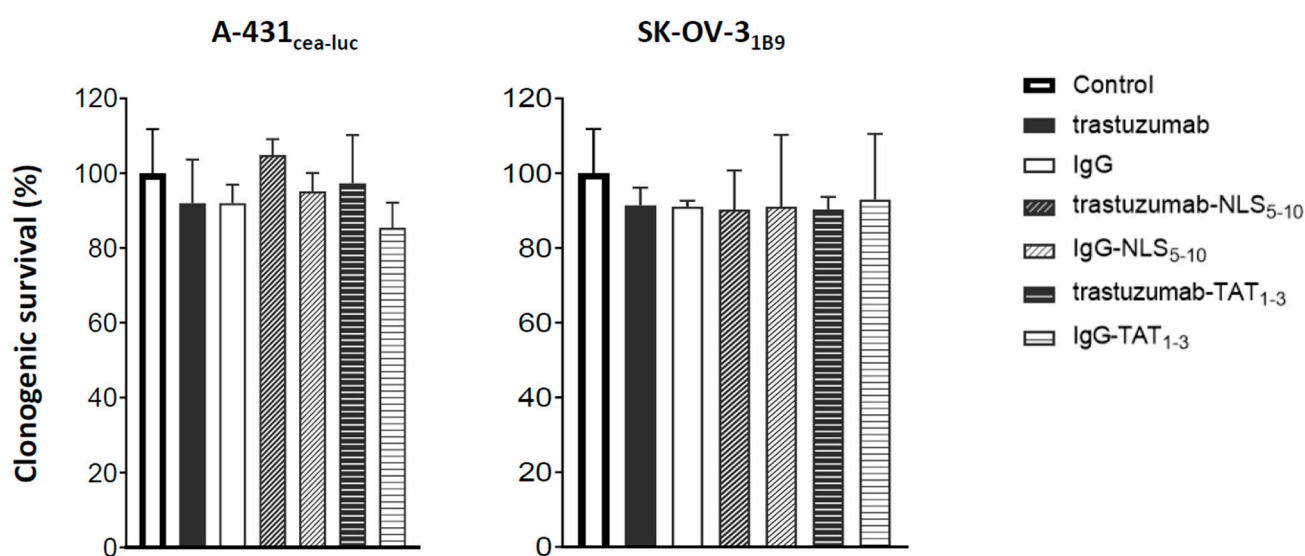

**Figure S1.** In vitro clonogenic cell death of unlabelled immunoconjugates. Clonogenic survival was assessed in A-431<sub>CEA-luc</sub> and SK-OV-3<sub>1B9</sub> cells 12 days after a 48 h exposure to trastuzumab, In-IgG, trastuzumab-NLS<sub>5-10</sub>, IgG-NLS<sub>5-10</sub>, trastuzumab-TAT<sub>1-3</sub> or IgG-TAT<sub>1-3</sub> (corresponding to the mAb mass added in the <sup>111</sup>In-treated 4 MBq/mL groups). Data are the mean ± SD. Experiments were performed at least three times in triplicate.
